# Supplementary material
Source: PubMed Central journal article supplement (PMC2396723)
Supplement: 0802981105_Supplemental_PDF.pdf [file 0802981105_Supplemental_PDF.pdf]

# Supporting Information

Minami et al. 10.1073/pnas.0802981105

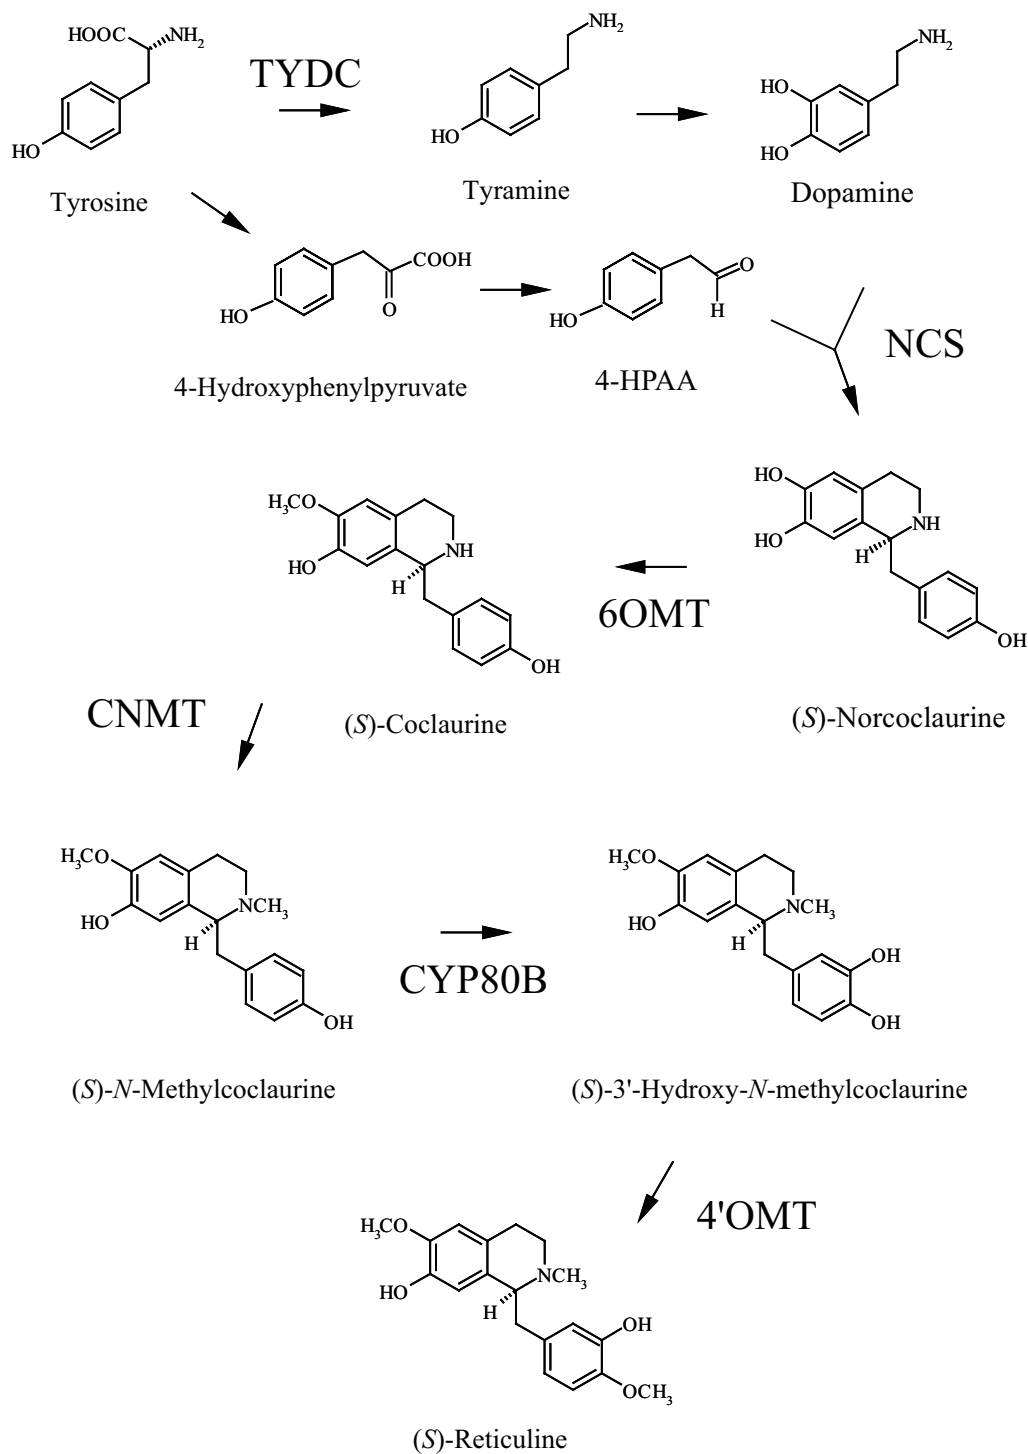

**Fig. S1.** Biosynthetic pathway of benzylisoquinoline alkaloid and biosynthetic genes. 4'OMT, 3'-hydroxy-N-methylcoclaurine 4'-O-methyltransferase; 6OMT, norcoclaurine 6-O-methyltransferase; CNMT, coclaurine N-methyltransferase; CYP80B, N-methylcoclaurine 3'-hydroxylase; NCS, norcoclaurine synthase; TYDC, tyrosine/dopa decarboxylase.

A

## Reticuline

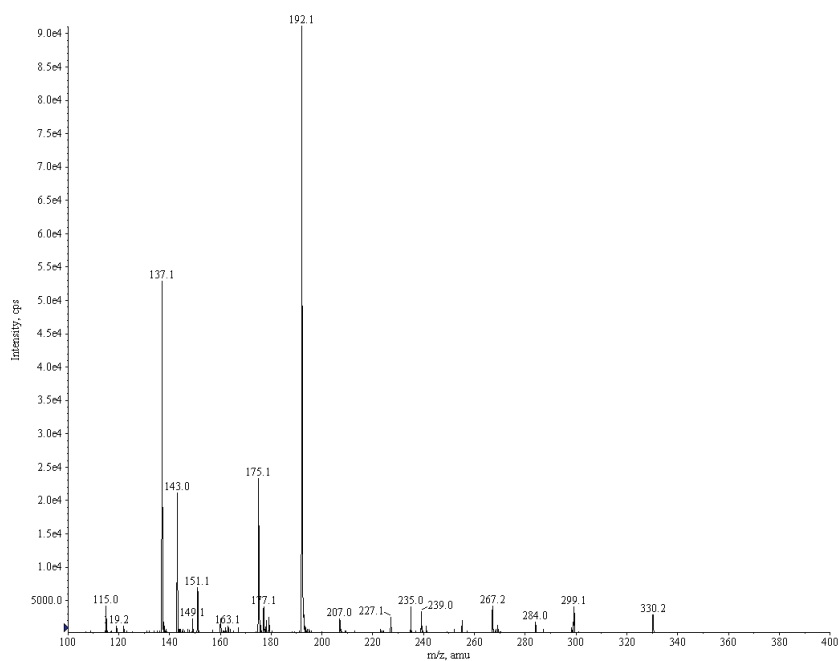

B

## Reaction product

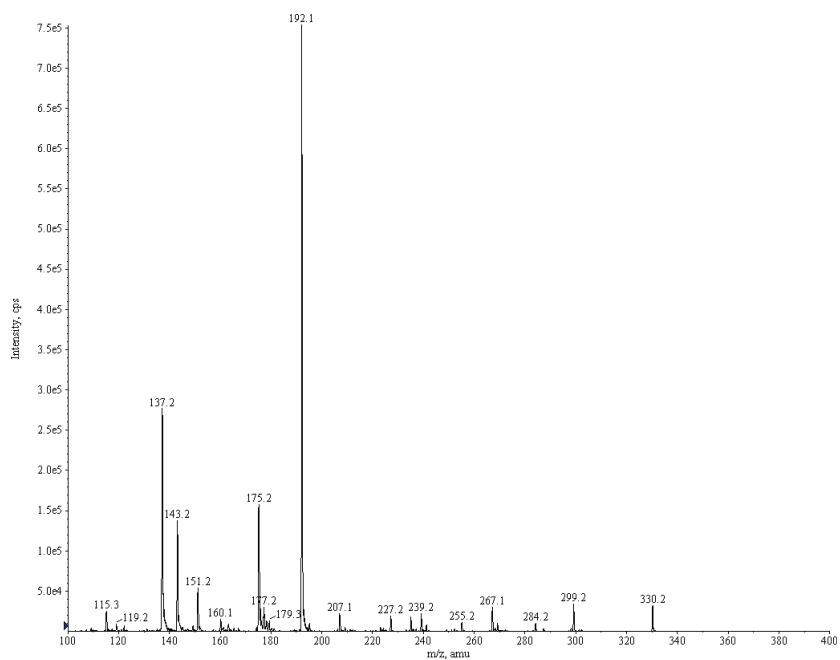

Fig. S2. Collision-induced dissociation (CID) mass spectrum for reticuline (A) and the reaction product in our system (B).

A

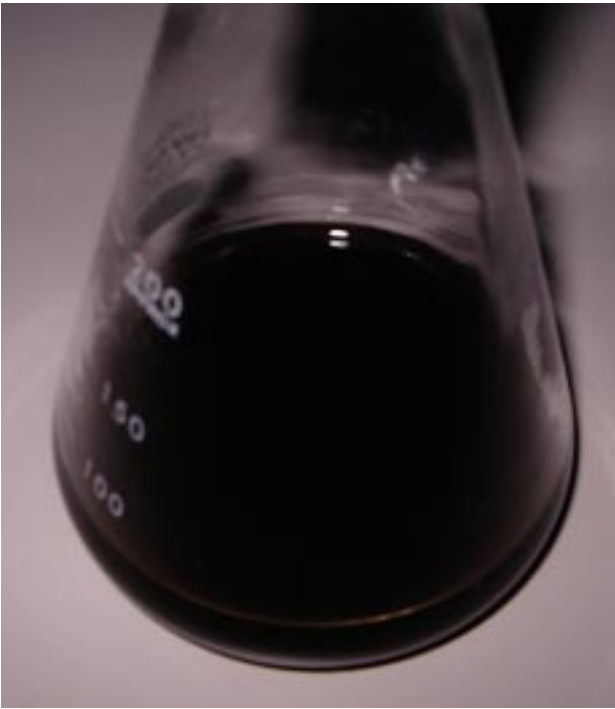

B

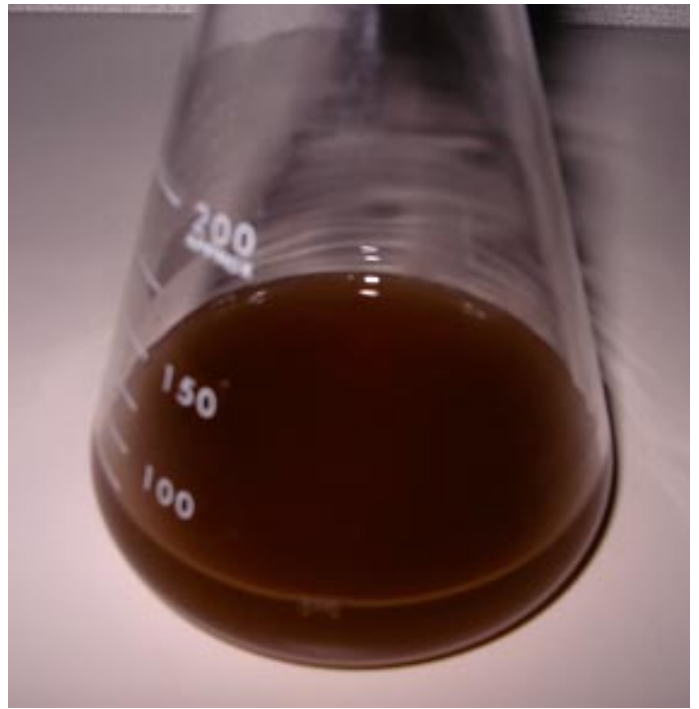

**Fig. S3.** Culture media of transgenic *E. coli* with empty vectors (A) and reticuline biosynthetic genes (B). *E. coli* cells were incubated at 25°C for 40 h in medium supplemented with 2 mM dopamine at IPTG induction.



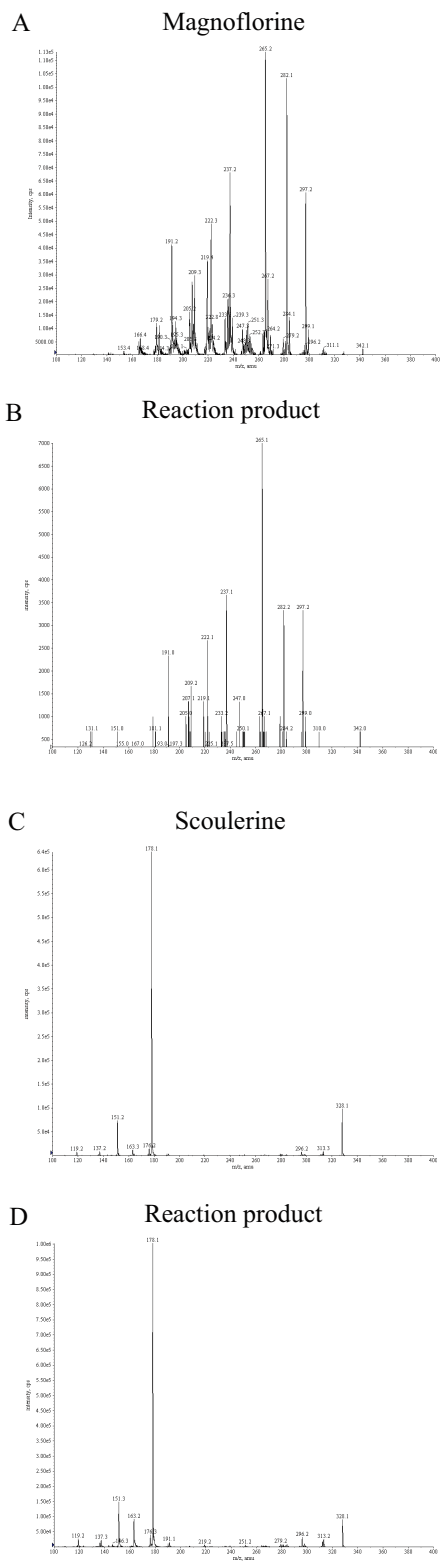

Fig. S5. CID mass spectrum for magnoflorine (A), reaction product in Fig. 4A (B), scoulerine (C), and reaction product in Fig. 4B (D).



**Table ST1. DNA sequences of the primers used**

| Primer name                                | Sequence                                               |
|--------------------------------------------|--------------------------------------------------------|
| EcoRI-MAO-F<br>(MAO forward primer)        | 5'- <u>TTGAATTC</u> ATGAGCAACCCGCATGTCGTG-3'<br>EcoRI  |
| Nrul-T7p-F<br>(NCS forward primer)         | 5'- <u>ACTCGCGAT</u> CCCCGCAAATTAATACG-3'<br>NruI      |
| KpnI-T7p-F<br>(6OMT forward primer)        | 5'- <u>AGGTACCGAT</u> CCCCGCAAATTAATACG-3'<br>KpnI     |
| BglII-T7p-F<br>(4'OMT forward primer)      | 5'- <u>CAGATCT</u> GATCCCCGCAAATTAATACG-3'<br>BglII    |
| BamHI-T7p-F<br>(CNMT forward primer) BamHI | 5'- <u>TGGATCCGAT</u> CCCCGCAAATTAATACG-3'             |
| KpnI-CNMT-F<br>(CNMT forward primer)       | 5'-TAT <u>GGTACCAT</u> GGCTGTGGAAGCAAAGCAA-3'<br>KpnI  |
| MAO-HindIII-R<br>(MAO reverse primer)      | 5'-CTA <u>AGCTT</u> CAGGCGCGGATGTCCCGGAG-3'<br>HindIII |
| T7t-BamHI-R<br>(NCS reverse primer)        | 5'- <u>CAGGATCC</u> CAGCAAAAAACCCCTCAAGAC-3'<br>BamHI  |
| 6OMT-BglII-R<br>(6OMT reverse primer)      | 5'- <u>CAGATCT</u> AATATGGATAAGCCTCAATCAC-3'<br>BglII  |
| 4'OMT-BamHI-R<br>(4'OMT reverse primer)    | 5'- <u>TGGATCCT</u> ATGGAAAAACCTCAATGACTG-3'<br>BamHI  |
| T7t-PstI-R<br>(CNMT reverse primer)        | 5'- <u>ACCTGCAGG</u> CAGCAAAAAACCCCTCAAGAC-3'<br>PstI  |
| CNMT-Sall-R<br>(CNMT reverse primer)       | 5'- <u>CCAGTCGACT</u> CATTTTTTCTTGAACAGAAC-3'<br>Sall  |

The underlined text denotes the restriction site sequences, and bold type indicates the start or stop codons.
